## **Refining clinical algorithms for a neonatal digital platform for low-income countries: a modified Delphi technique**

Mari Evans,<sup>1\*</sup> Mark H. Corden,<sup>2,3\*</sup> Caroline Crehan,<sup>1</sup> Felicity Fitzgerald,<sup>1</sup> Michelle Heys<sup>1,4</sup>

<sup>1</sup>Great Ormond Street Institute of Child Health, University College London, London, UK

<sup>2</sup>Division of Hospital Medicine, Department of Pediatrics, Children's Hospital Los Angeles, Los Angeles, CA, USA

<sup>3</sup>Department of Pediatrics, Keck School of Medicine, University of Southern California, Los Angeles, CA, USA

<sup>4</sup>Specialist Children's and Young People's Services, East London NHS Foundation Trust, London, UK

\* denotes co-first authors

Corresponding Author:

Mari Evans

c/o Dr Michelle Heys

UCL Great Ormond Street Institute of Child Health

30 Guilford Street

London, WC1N 1EH

United Kingdom

[mari.evans@doctors.org.uk](mailto:mari.evans@doctors.org.uk)

Word count: 4752

## **ABSTRACT**

### **Introduction**

Nearly three million newborns die annually worldwide. Implementation of evidence-based measures could prevent two thirds of these deaths. A neonatal digital platform (NeoTree) is being designed to support healthcare workers (HCWs) in low-income countries (LICs). A key function is the digital implementation of evidence-based guidelines as clinical support algorithms. We aimed to determine whether a panel of neonatal experts could address evidence gaps by reaching a consensus on four clinical decision algorithms: neonatal sepsis, hypoxic ischaemic encephalopathy, respiratory distress of the newborn and hypothermia.

### **Methods**

This was a consensus-generating study using a two-step modified Delphi technique. In round one, experts rated algorithm items and justified their responses. Items meeting consensus ( $\geq 80\%$  agreement) were included. Items not meeting consensus were either excluded, included following revisions or included if they contained core elements of evidence-based guidelines. In round two, experts rated items from round one that did not reach consensus.

### **Results**

Fourteen experts participated in round one, ten in round two. Nine were from high-income countries, five from LICs. Experts included physicians and nurse practitioners with an average neonatal experience of 20 years, 12 in LICs. After two rounds, a consensus was reached on 43 of 84 items (52%). Experts consistently stated that items must be in line with local and WHO guidelines (irrespective of the level of supporting evidence or expert opinion). As a result, the final algorithms included 53 (62%) items.

### **Conclusion**

Four algorithms in a neonatal digital platform were reviewed and refined by consensus expert opinion. Revisions to the NeoTree application were made in response to these findings and will be clinically validated in an imminent study.

## **KEYWORDS**

Child health, other diagnostic or tool, other study design, paediatrics, public health

## **KEY QUESTIONS**

### **What is already known?**

- Digital platforms are emerging technologies that may be able to address preventable neonatal deaths by making clinical algorithms based on guidelines readily available to low-skilled frontline healthcare workers to promptly treat critically ill newborns.

### **What are the new findings?**

- The Delphi technique can be used to expertly review and modify clinical support algorithms in a neonatal digital platform for LICs.
- In this study, half of the algorithm items met consensus for inclusion in the management pathways.

### **What do the new findings imply?**

- Making expert-reviewed algorithms more accessible to front-line healthcare workers through a digital platform has the potential to improve neonatal outcomes in LICs.
- Expert discussion highlighted gaps in current evidence and emphasised the need for future research to support international neonatal guidelines.

## INTRODUCTION

Globally, 2.5 million newborns die each year in the first 28 days of life.[1] Most of these deaths (98.5%) occur in low-income countries (LICs), and 40% occur on the first day of life.[2] While under-five child mortality rates experienced a significant reduction as part of the Millennium Development Goals, neonatal rates have not declined at the same pace. The neonatal mortality rate has been halved since 1990,[3] but modelling of global newborn mortality data suggests that a further two thirds of current deaths could be prevented if evidence-based solutions were implemented.[2] One of the World Health Organisation (WHO) Sustainable Development Goals (SDG3) is to end preventable deaths of newborns in all countries and to reduce the neonatal mortality rate from the current rate of 18 per 1000 live births to less than 12 per 1000 by 2030.[4] Targeting newborn care in LICs is thus an urgent priority, especially the three most common causes of mortality – infections (36%), prematurity (28%), and intrapartum complications (23%).[2]

Mobile health (m-health) technology and digital platforms are potential approaches to improve the quality of newborn care. They are tools with broad applicability (three quarters of the world now own mobile phones) that are scientifically rigorous and tailored to local patient and healthcare worker (HCW) preferences and resources.[5] A study in Tanzania improved adherence to the Integrated Management of Childhood Illness protocol and assessments of acutely unwell children with an electronic, compared to paper-based, format.[6] M-health and digital platforms can also provide clinical decision algorithms which translate guidelines into context-specific and user-friendly diagnostic aids and management plans. Community HCWs in rural Bangladesh were trained to use a mobile application for neonatal assessment and improved their clinical evaluations, the accuracy of their diagnoses, and their adherence to neonatal

management guidelines.[7] Other attempts have been made to introduce health technologies, but most are not available when and where they are needed.[8]

An international team of researchers, clinicians and software developers in the UK, USA, Malawi, Bangladesh and Zimbabwe co-designed and co-developed with Malawian and Zimbabwean HCWs a neonatal digital platform (NeoTree) for facility-based newborn care. It combines immediate digital data capture (which is shared with HCWs via local dashboards), evidence-based algorithmic clinical decision and management support, newborn education and data linkage to national data systems on one platform.[9] The algorithms in the Malawian version of the NeoTree support decisions according to established international[10] and Malawian neonatal guidelines.[11] Local guidelines were combined with international guidelines to accommodate local conditions and to encourage buy-in from local stakeholders. NeoTree is in the phase of application co-development where appropriate revisions to the algorithms are needed to address gaps in evidence for the guidelines.[12] In the absence of extensive trial or epidemiological data, alternative techniques to consolidate best available lower level evidence can be used, such as expert opinion. This study aims to use the modified Delphi technique to determine whether a panel of experts in newborn care can reach a consensus opinion about key clinical decision algorithms used in a digital platform to assist HCWs caring for facility-based unwell newborns in LICs.

## **METHODS**

### **Study design**

This study used a two-step modified Delphi technique.[13] The Delphi technique was chosen because it is an effective method of gathering expert knowledge from geographically diverse leaders in the field to address complex clinical problems that lack evidence.

## **Recruitment**

Twenty-two neonatal experts were invited to participate in the study. This number represented an adequate sample size[14, 15] and permitted a manageable amount of data collection. Participants were recruited if they were a physician or neonatal nurse practitioner with more than ten years neonatal experience (at least three in LICs), neonatal postgraduate training, fluency in English, internet access and willingness to participate.

Neonatal experts known to the researchers for their clinical expertise, research and contributions to guideline development in LICs were identified in equal numbers from both LICs and HICs. Experts were asked for their willingness to participate in the study via an email which included the objectives of the Delphi study, expected time commitment and an information sheet on the NeoTree digital platform. At the time of acceptance to the study, experts were asked to provide their demographic details. No financial incentive was offered, but reimbursement for costs of Skype calls was provided for some experts in LICs.

## **Algorithms and item generation**

The four clinical decision algorithms selected for review were neonatal sepsis, hypoxic ischaemic encephalopathy (HIE), respiratory distress of the newborn and hypothermia. These algorithms were selected because they are the leading preventable causes of neonatal mortality globally. These conditions also happen to be the most difficult to diagnose and manage appropriately in LICs with some of the weakest WHO GRADE recommendations and quality of evidence.[16] For example, the European definition of neonatal sepsis is two or more clinical symptoms and two or more laboratory signs in the presence of, or as a result of, suspected or proven infection.[17] This definition is not possible in LICs where laboratory investigations are not routinely available.

Items were identified by comparing the algorithms side-by-side with the international (WHO) and local neonatal guidelines (Care of the Infant and Newborn in Malawi - COIN) from which they had been derived. This comparison generated a comprehensive list of items where discrepancies in diagnostic parameters and treatment recommendations required expert opinion. A total of 75 items were generated based on the algorithm-versus-guideline comparison, with the greatest number concerning neonatal sepsis (43), followed by HIE (21), respiratory distress of the newborn (10) and hypothermia (1). Fewer items were identified for certain algorithms because they were developed from simpler evidence-based guidelines. Once finalised, the clinical algorithms and list of items (henceforth referred to as questionnaire) were piloted with two paediatricians with neonatal experience in LICs to gain clarity on questions the experts might ask, approximate time commitment required, and experts' comprehension of each questionnaire item. Ambiguous items were amended accordingly. The questionnaire was circulated by email to the experts with specific instructions at least two weeks before they were interviewed. Each algorithm was verbally and diagrammatically explained with their references specified (i.e., WHO, COIN or NeoTree research team) to aid in decision-making during the interview (online supplementary file 1).

### **Round One**

Interviews were conducted in June and July 2018. Experts were sent up to two reminder emails to schedule their phone or Skype interview. Interviews were conducted privately from a home office. Standardised questions were used to review each item from the questionnaire. Experts were asked to rate their level of agreement for each item using a five-point Likert scale.[18] Each rating was followed by open-ended questions to obtain the experts' rationale for their response. In addition, experts were asked if they would suggest amendments for each item or propose



additional items for each algorithm. All interview data were transcribed using both the audio-recordings and the notes made during the interview by the facilitator. Expert responses that were the same or meant the same thing were grouped together into one item. Unique responses from experts based on their research, evidence or personal experience were translated verbatim. All responses were anonymised (with participant numbers) and reviewed together with the quantitative results.

Based on sample size, the level of agreement for consensus opinion from the panel was set at 80%. [14] Items that met consensus ( $\geq 80\%$  agreement) were included or were modified with minor changes to wording based on expert advice. Items that did not meet consensus ( $< 80\%$ ) were removed or modified according to the feedback from the expert panel and submitted for the second round. Items that did not meet consensus were still included if they were part of WHO and COIN guidelines so that frontline HCWs continued to follow the current standard of care. A second questionnaire was designed with modified items and expert additions from the first round.

## **Round Two**

Round two was conducted electronically in June and July 2019. In round two, the 14 experts from round one were emailed the second questionnaire (online supplementary file 1), which consisted of items that had variance in agreement from round one along with all the suggestions and additions from the experts. A results summary from round one was sent to the experts, and the full set of anonymised results were made available at their request. Thus, the experts could reflect on the group results while preserving the anonymity of their responses.

The experts used the same Likert scale rating method as in the first round and were again encouraged to give explanations for their responses. Results were collected in writing by email.

Experts were asked to respond within two weeks of sending out the second questionnaire, and two email reminders were sent. Final responses were analysed as described in round one, and items meeting  $\geq 80\%$  consensus were kept for the final NeoTree algorithms.

### **Patient and public involvement**

While key stakeholders were involved in co-developing the NeoTree digital platform, there was no patient or public involvement in this Delphi study.

### **Facilitator**

The facilitator is a UK-trained female Consultant Paediatrician with an academic interest in global health, 12 months practise experience in South Africa and contributions to neonatal projects in Rwanda, Democratic Republic of Congo and Bangladesh over the last 7 years. Five participants were known to the facilitator professionally. All participants were informed that the facilitator had no personal investment in NeoTree outside of this study.

### **Ethics approval**

Ethics approval was not required for this study.

### **Consent procedures**

The goals and processes of the project were explained to the experts in their email invitation, and consent was obtained by email agreement. Experts were verbally informed at the beginning of the first round that their responses would be kept anonymous.

## **RESULTS**

Twenty-two neonatal experts were invited to participate in this study. Sixteen responded; one declined due to lack of financial incentive, and one declined due to conflict of interest.

Demographics of the expert panel are listed in Table 1. All experts had worked in Africa.

---

**Characteristics**

**N = 14 (%)**

---

|                                                                     |                   |                |
|---------------------------------------------------------------------|-------------------|----------------|
| Location                                                            | Experts from HICs | 9 (64)         |
|                                                                     | Experts from LICs | 5 (36)         |
| Level of expertise                                                  | Neonatologist     | 6 (43)         |
|                                                                     | Paediatrician     | 6 (43)         |
|                                                                     | ANNP              | 2 (14)         |
| Years of neonatal experience post medical school<br>(mean $\pm$ SD) | Overall           | 20 ( $\pm$ 12) |
|                                                                     | In LICs           | 12 ( $\pm$ 7)  |
| Work experience in low-income countries                             | Africa            | 14 (100)       |
|                                                                     | Asia              | 7 (50)         |
|                                                                     | Central America   | 4 (28)         |
| Country of medical degree                                           | United Kingdom    | 7              |
|                                                                     | United States     | 2              |
|                                                                     | South Africa      | 2              |
|                                                                     | Zimbabwe          | 1              |
|                                                                     | Rwanda            | 1              |
|                                                                     | Sudan             | 1              |

**Table 1.** Characteristics of the Delphi panel from round one

ANNP, advanced neonatal nurse practitioner; HICs, high-income countries; LICs, low-income countries

### Round One

Fourteen experts (63% response rate) completed round one. Interviews averaged 73 minutes (40-110 minutes). Thirty-four items (45%) reached consensus (Figure 1). These items were either: (1) included, unmodified (32%); (2) included, modified (11%) (e.g. minor changes to wording); or (3) changed for clarification in the second round (2%). Items that did not reach consensus (55%) were either: (1) excluded from the revised algorithm (30%); (2) included because they were part of WHO/COIN guidelines or the Thompson score (11%);[19] or (3) changed and submitted for a second round (14%).

Minor changes to wording usually involved adopting the language utilized by WHO or COIN, but there were items that experts felt needed clarifying. For example, experts felt that “*twitching or abnormal movements*” needed to be added to the WHO term ‘convulsions’ because seizures in a neonate can be very subtle: “*it may be abnormal movements of the lips or [...] the legs which people don’t class as convulsions.*”

The expert panel consistently stated that algorithm items must comply with WHO danger signs or symptoms and COIN guidelines for neonatal sepsis, irrespective of whether the panel agreed with them. For example, experts thought that ‘bulging fontanelle’ was “*subjective; there are non-infectious causes ... many babies’ fontanelles bulge when they just cry.*” Another item that did not meet consensus was ‘poor feeding,’ which experts found vague for multiple reasons, including: “*it is too subjective; it depends on how long for ... many newborns do not feed well on the first day of life.*” However, experts agreed that poor feeding was a sign of possible sepsis if it was “*a new onset of poor feeding when the infant had previously been feeding well.*” This item was changed to ‘new onset of poor feeding’ for the final algorithm.

Two items that were included because they are part of the COIN guidelines highlighted inconsistencies with WHO guidelines. For example, COIN uses a temperature of more than 37.5°C as a fever for a newborn, whilst WHO and most experts use more than 38°C. Therefore, 37.5°C was included for the Malawian digital platform, but 38°C will be used for other countries. Other items where a difference between the recommendations and the guidelines occurred were antibiotic choice and duration for neonatal sepsis.

Items that did not meet consensus that could not be revised easily or were not included in the WHO or COIN guidelines were edited according to feedback from the expert panel and submitted for the second round. For example, experts disagreed that ‘very/extremely premature

(<32 weeks gestation)’ was a major risk factor for sepsis if “*the baby was delivered as a clean cold caesarean section for maternal reasons and the mother was not in labour.*” Eighty percent of experts highlighted that the algorithm should include weight to guide gestation because “*gestation is often unknown*” and “*you are relying on [the] Ballard score which has plus or minus two weeks accuracy.*” Similar opinions regarding method of delivery and the importance of birth weight were expressed for ‘slightly premature (32-36 weeks gestation),’ but it did meet consensus as a minor risk factor. Both gestational age brackets were submitted into the second round as risk factors for sepsis after modifying the items to include WHO weight parameters to guide gestation.

Other items that did not gain consensus and were submitted for the second round included items that experts felt needed further clarification. ‘Born before arrival’ as a minor risk factor for sepsis was clarified to the experts that this meant the baby was born en-route to the hospital (either in a vehicle or on the roadside, both being considered dirty environments in Malawi). A ‘neonate admitted with or history of a fever’ as a minor risk factor for sepsis was changed to ‘mother reports a non-measured fever’ in the second round. Lastly, because experts considered the term ‘birth injury’ unclear, we asked them in round two to define what they considered a ‘significant birth injury.’ Table 2 shows which items reached consensus and their outcome for each algorithm.

**Table 2.** Round one heat chart to show which items met consensus and their outcomes.

| Subject                         | Items                                                      | Agree | Outcome                   |
|---------------------------------|------------------------------------------------------------|-------|---------------------------|
| Sepsis<br>Diagnosis<br>Major RF | Maternal fever >38°C in labour                             | 91%   | Include                   |
|                                 | PROM > 18 hours                                            | 74%   | Include (WHO RF)          |
|                                 | Offensive smelling liquor                                  | 74%   | Include (WHO RF);<br>MCTW |
|                                 | Very / extremely premature (<32/40 weeks)                  | 74%   | Second round              |
|                                 | Prolonged second stage (>3 hrs)                            | 53%   | Exclude                   |
| Minor RF                        | Prematurity (32-37 weeks gestation)                        | 81%   | Second round              |
|                                 | Born before arrival                                        | 70%   | Second round              |
| Major signs/<br>symptoms        | Boil/abscess                                               | 93%   | Include                   |
|                                 | Grunting or severe respiratory distress or moderate-severe | 97%   | Include                   |

|                                 |                                                                      |      |                                                      |
|---------------------------------|----------------------------------------------------------------------|------|------------------------------------------------------|
|                                 | work of breathing                                                    |      |                                                      |
|                                 | Lethargy                                                             | 93%  | Include                                              |
|                                 | Red skin all around umbilicus                                        | 81%  | Include, MCTW                                        |
|                                 | Jaundice <24 hrs old                                                 | 83%  | Include, MCTW                                        |
|                                 | Tachypnoea >60 bpm (>2 hrs old)                                      | 83%  | Include, MCTW                                        |
|                                 | Convulsions                                                          | 89%  | Include, MCTW                                        |
|                                 | Pustules all over body                                               | 80%  | Include, MCTW                                        |
|                                 | Bulging fontanelle                                                   | 77%  | Include (WHO danger sign)                            |
|                                 | Temperature >37.5°C                                                  | 73%  | Include for Malawi version                           |
|                                 | Admitted with or history of fever                                    | 68%  | Second round                                         |
|                                 | History of apnoea                                                    | 67%  | Exclude                                              |
|                                 | Bilious vomiting                                                     | 61%  | Second round                                         |
| Minor signs/<br>symptoms        | Tachypnoea 60-80 bpm & <2 hrs old                                    | 85%  | Include                                              |
|                                 | Pallor                                                               | 81%  | Include                                              |
|                                 | Weak or absent suck (AND >34/40 weeks)                               | 73%  | Exclude                                              |
|                                 | Poor feeding                                                         | 73%  | Include (WHO danger sign), MCTW                      |
|                                 | Irritability                                                         | 70%  | Second round                                         |
|                                 | Distended abdomen                                                    | 67%  | Second round                                         |
|                                 | Heart rate >160 that cannot be explained by fever/crying             | 64%  | Exclude                                              |
|                                 | Mild work of breathing                                               | 55%  | Exclude                                              |
| Additional RF?                  | Cut-off at 72 hrs for early vs late neonatal sepsis?                 | 100% | Include                                              |
|                                 | Definition of maternal fever >38°C?                                  | 93%  | Include                                              |
|                                 | Should PROM be >18 hrs or >24 hrs in LICs?                           | 93%  | Include >18 hrs                                      |
|                                 | Hypothermia < 35.5 °C                                                | 83%  | Second round                                         |
|                                 | Fever in a newborn should be classified as >37.5°C in this setting?  | 83%  | Include                                              |
|                                 | Please comment on our weighting system of Major = 100% / Minor = 50% | 77%  | Exclude                                              |
|                                 | Cut-off at >34/40 weeks for absent suck as a sign of sepsis?         | 60%  | Exclude                                              |
|                                 | Reduced movement of limbs                                            | 43%  | Exclude                                              |
| Management                      | Joint swelling                                                       | 42%  | Exclude                                              |
|                                 | Criteria for 'consider meningitis'                                   | 42%  | Second round                                         |
|                                 | Do you agree with the antibiotic doses?                              | 93%  | Include                                              |
|                                 | Do you agree with the specified sepsis investigations if possible?   | 83%  | Include                                              |
|                                 | Antibiotic duration for symptomatic sepsis = 7-10 days?              | 83%  | Include (change to stop at day 7 if clinically well) |
|                                 | Do you agree with the antibiotic choices if no local recommendation? | 80%  | Include (add WHO choices)                            |
|                                 | Antibiotic duration for asymptomatic sepsis = 5 days?                | 66%  | Include for Malawi, exclude for international        |
| <b>Birth Asphyxia Diagnosis</b> | Resuscitation: BVM >5 mins / CPR >10 mins                            | 94%  | Include                                              |
|                                 | Foetal distress                                                      | 86%  | Include, MCTW                                        |
|                                 | Apgar at 5 mins <7                                                   | 78%  | Include as per COIN                                  |
|                                 | Vaginal breech                                                       | 76%  | Exclude                                              |
|                                 | Prolonged second stage >3 hrs duration                               | 73%  | Exclude                                              |
|                                 | Vacuum delivery                                                      | 69%  | Exclude                                              |
|                                 | Emergency caesarean section                                          | 61%  | Exclude                                              |
|                                 | Birth injury                                                         | 44%  | Second round                                         |
| Signs/                          | Convulsions                                                          | 93%  | Include                                              |

|                         |                                                                                                                           |      |                                   |
|-------------------------|---------------------------------------------------------------------------------------------------------------------------|------|-----------------------------------|
| symptoms                | Coma                                                                                                                      | 89%  | Include                           |
|                         | Lethargy                                                                                                                  | 84%  | Include                           |
|                         | Hypotonia and gestation >34/40 weeks                                                                                      | 80%  | Include                           |
|                         | Irritable                                                                                                                 | 77%  | Exclude                           |
|                         | Absent suck and gestation >34/40 weeks                                                                                    | 64%  | Second round                      |
|                         | Should birth asphyxia be classified as mild, moderate or severe?                                                          | 54%  | Exclude                           |
| Additional RF?          | Exclude the Moro reflex in LICs due to the difficulties of training HCW in checking safely?                               | 80%  | Include as part of Thompson score |
|                         | Poor feeding                                                                                                              | 49%  | Exclude                           |
|                         | Respiratory distress                                                                                                      | 43%  | Include as part of Thompson score |
|                         | Weight >4kg                                                                                                               | 43%  | Exclude                           |
| Management              | Give intravenous fluids if not tolerating oral or nasogastric feeds?                                                      | 97%  | Include                           |
|                         | No passive cooling for infants in LICs?                                                                                   | 94%  | Include                           |
| <b>RDN Diagnosis</b>    | Do you agree with tachypnoea of >60 bpm for the other categories of RDN?                                                  | 100% | Include                           |
|                         | Tachypnoea of 60-80 bpm <2 hrs old without signs or symptoms of sepsis should be treated as TTN and no antibiotics given? | 76%  | Exclude                           |
|                         | History of fast/laboured/noisy breathing is relevant as a sign or symptomatic of RDN when not present on admission?       | 44%  | Exclude                           |
| RDN diagnostic criteria | Meconium aspiration syndrome                                                                                              | 82%  | Include                           |
|                         | Transient tachypnoea of the newborn                                                                                       | 66%  | Exclude                           |
|                         | Respiratory distress syndrome                                                                                             | 63%  | Second round                      |
|                         | Congenital pneumonia                                                                                                      | 63%  | Second round                      |
| Management              | Cut-off of 90% O <sub>2</sub> saturations before giving oxygen?                                                           | 91%  | Include                           |
|                         | Give antibiotics in all cases except TTN?                                                                                 | 77%  | Exclude                           |
|                         | Time cut-off of 2 hours for TTN? Would you have a higher or lower threshold?                                              | 54%  | Exclude                           |
| <b>Hypothermia</b>      | Diagnostic criteria for hypothermia?                                                                                      | 100% | Include                           |

BPM, breaths per minute; BVM, bag valve mask; CPR, cardiopulmonary resuscitation; HCW, health care worker; LICs, low-income countries; MCTW, minor changes to wording; PROM, prolonged rupture of membranes; RDN, respiratory distress of the newborn; RF, risk factor; TTN, transient tachypnoea of the newborn; WHO, World Health Organisation

### Key findings by algorithm

The first important finding was that the ‘major’ or ‘minor’ algorithmic weighting system (where one major risk factor for sepsis is equivalent to two minors) used to diagnose neonatal sepsis was near consensus (77%) but did not meet the 80% threshold. Experts called for further evidence before adopting this system: “*It is a difficult thing to do...you need to work out how specific and sensitive the app is by looking at blood cultures.*” Two experts suggested using a risk score

calculator, and another two experts highlighted that WHO only uses danger signs. This weighting system was subsequently removed from the algorithm (Figure 2).

The second key algorithmic feedback was on HIE. An academic expert in neonatal encephalopathy discouraged the use of the term ‘birth asphyxia,’ a term used by Malawian HCWs and therefore incorporated into the original algorithm.

*You really must not call it birth asphyxia because birth asphyxia means failing to breathe at birth and what you are talking about is encephalopathy. I know they use this expression in low resource settings, but we must not propagate it.*

Additional feedback on the algorithm focused on the combination of risk factors or clinical signs and symptoms to consider or diagnose HIE. Experts cited a lack of evidence for using risk factors to diagnose birth asphyxia and that the application should only be using clinical signs and symptoms.

*Birth asphyxia is not about risk factors. If you have encephalopathy it is a clinical diagnosis, and it is irrelevant what your risk factors are. Any baby could be encephalopathic because most women are not adequately monitored...you do not need a risk factor to be encephalopathic.*

Experts recommended utilizing a validated encephalopathy score,[19, 20] which was incorporated into the HIE algorithm. The risk factors that met consensus will be used as prompts to perform the Thompson score, which uses clinical signs and symptoms exclusively to diagnose HIE.

Third, for the respiratory algorithm, experts highlighted that “*it is hard to make an accurate diagnosis of a respiratory condition without investigations.*” Therefore, the algorithm should focus instead on the management of respiratory distress. All respiratory conditions (respiratory



distress syndrome, meconium aspiration, congenital pneumonia and transient tachypnoea of the newborn (TTN)) now fall under the umbrella diagnosis of respiratory distress of the newborn within the algorithm. However, for teaching purposes the four respiratory conditions will be included as ‘diagnoses to consider’ in the management.

TTN was defined by the NeoTree research team as a term newborn who is tachypnoeic but has no risk factors or signs and symptoms of sepsis and is less than two hours old. The proposed NeoTree respiratory algorithm differentiated TTN from other respiratory conditions so that these newborns did not get antibiotics. There was no expert consensus on the time cut-off at two hours, and the range suggested varied between one to 24 hours. Despite experts’ concerns about antibiotic overprescribing in LICs and the need to differentiate TTN from other respiratory conditions, they did not think this was currently feasible in LICs. First, the experts felt that HCWs are too busy to reassess a neonate at two hours of life. Second, limitations in resources and knowledge in LICs ultimately mean that *“you can’t distinguish or know for certain that it is TTN.”* Therefore, *“all babies with respiratory distress need to be given antibiotics, and it is too difficult to be making exemptions.”* This opinion supports *“the WHO guidelines [which] say give the baby antibiotics.”* None of the TTN items met consensus, and they were removed from the final algorithm.

Finally, for the hypothermia management algorithm, experts commented that first-line treatment for all newborns be skin-to-skin care including those who were severely hypothermic (<32°C) unless they showed any signs or symptoms of being unstable. Additionally, experts did not think it was realistic to review a newborn every 15-30 minutes when hypothermic.

## **Round Two**

Ten (71%) experts completed round two, seven electronically and three by telephone interview. Four experts dropped out (three from HICs, one from LIC); three did not respond to email reminders and one expert was unable to meet the completion deadline. Nine items (41%) reached consensus (Figure 1). These items were either (1) included, unmodified (36%) or (2) included, modified in the revised algorithm (5%). Items that did not reach consensus (59%) were either (1) excluded (41%) or (2) included, modified according to WHO guidelines or expert suggestion (18%).

In round one experts indicated that hypothermia was a major sign of sepsis and should be included in the sepsis algorithm if persistent. In round two we clarified that the application is to be used at the time of admission onto the neonatal unit, at which point the HCW will only have one temperature reading. Experts in round two disagreed that a single temperature reading of  $<35.5^{\circ}\text{C}$  was a sign of sepsis and felt that it would more likely be due to environmental hypothermia, a common problem in LICs. Additionally, in round two it was established that experts were much more concerned with extremely premature  $<1500\text{g}$  neonates (88% consensus) compared to slightly premature  $1500\text{-}2500\text{g}$  neonates (62% consensus) being at risk for neonatal sepsis. Central cyanosis was an addition to the second round as an expert suggestion to include all WHO danger signs. This item just missed consensus (with 78% agreement) because experts felt it was not specific to sepsis: “*central cyanosis could be [due to] a host of causes.*” Despite not meeting consensus, this item was ultimately included in the final sepsis algorithm to comply with WHO guidelines for danger signs.

All of the respiratory items marginally missed consensus. All three items were still included in the final teaching algorithms with revisions in line with WHO diagnostic criteria. For example, the gestational age for possible respiratory distress syndrome in the first round was  $<37$  weeks,

but it did not meet consensus because some experts felt the age should be set lower. However, in round two the expert-suggested gestational age of 34 weeks did not meet consensus. Therefore, we decided to accept the WHO definition of prematurity as <37 weeks as a risk factor for developing respiratory distress syndrome. Both items for the diagnostic criteria of congenital pneumonia did not meet consensus for the following reasons: “*coarse crackles even if bilateral can be confusing on day one due to TTN especially after caesarean deliveries;*” “*coarse crackles are not a reliable sign of pneumonia.*” This item was changed to ‘crepitations on auscultation’ to match WHO terminology. The narrow temperature margin of ‘36.5-37.5°C’ for congenital pneumonia did not meet consensus. Experts suggested using >38°C and <36°C. As previously highlighted, a fever is 37.5°C in the COIN guidelines, so this temperature parameter could not be changed in the Malawian setting. However, the lower margin was adjusted to 36°C in the algorithm based on expert recommendation. Modifications to the algorithms can be found in online supplementary file 2.

## **DISCUSSION**

We report the use of a modified Delphi technique to review digital clinical pathway algorithms for four neonatal conditions managed by HCWs in LICs. Approximately two thirds (62%) of the original algorithm items were ultimately included for use in the NeoTree digital platform based on consensus expert opinion and national/international guidelines. The NeoTree team revised the algorithms based on this feedback. Expert discussion emphasised gaps in evidence in neonatal care in LICs, highlighting areas for future research. Data generated by tools such as NeoTree can be used to address some areas where evidence is lacking.

Each algorithm had components that triggered debate amongst the experts. For neonatal sepsis, three key points were discussed. First, experts called for further evidence before adopting a

‘major’ and ‘minor’ algorithmic weighting system to diagnose neonatal sepsis. In response the NeoTree research team are conducting a study in Zimbabwe and Malawi looking at which clinical indicators are predictors of positive blood cultures. Second, there was disparity in opinion regarding whether to give prophylactic antibiotics and the duration of antibiotics for newborns with risk factors for sepsis who remain clinically well without any supporting investigations (NeoTree’s equivalence to asymptomatic sepsis). The WHO recommendation to administer prophylactic antibiotics for a neonate with maternal risk factors for sepsis only is considered weak with very low-quality evidence.[21] Despite reaching a consensus on particular risk factors (prolonged rupture of membranes, maternal fever), experts also highlighted the evidence base as weak. In terms of duration of treatment for asymptomatic sepsis, while expert opinion varied, the Malawian guidelines recommend a five-day course[11] whilst WHO recommends two days.[16] The NeoTree algorithms will therefore keep to local and international recommendations, but the NeoTree team will feed back to the Malawian COIN expert panel that consensus suggested five days is too long to treat newborns with sepsis risk factors only. Third, experts disputed the treatment choice and duration for symptomatic neonatal sepsis; incidentally, WHO recommendations lack strong evidence or efficacy.[22]

For the HIE algorithm, the Thompson score was preferred because it is simpler to perform, less time consuming, and better at predicting poor outcomes in moderate and severe HIE during the first hours of life as compared to the Sarnat score at 24 hours.[19] The NeoTree research team suspected that measures such as examining for posturing and Moro reflex would be relatively complicated for frontline HCWs with minimal training to assess. However, neonatal experts’ experience and previous studies in LICs[23] assured the team that the score is relatively straightforward to teach.

Several points of discussion also centred on the respiratory algorithms. First, experts noted that even with investigations in HICs respiratory conditions may be difficult to diagnose.[24] Second, experts agreed that all neonates with signs of respiratory distress should have respiratory support and antibiotics, including those with possible TTN, due to the inability to safely exclude other conditions in this setting. A recent study justified the use of antibiotics for tachypnoea alone in a neonate in a resource-limited setting.[25] Third, experts recommended performing chest x-rays (if available) only if imaging would change management (e.g. a longer course of antibiotics for congenital pneumonia) or if the neonate was deteriorating. The WHO does not advise on when to perform a chest x-ray for a newborn but does advise that one should be performed in children with severe pneumonia or pneumonia not responding to treatment (WHO 2013).

With the proliferation of clinical digital platforms in HICs and LICs, there is growing concern with the quality and safety standards of their clinical guidance. Countries and organisations (including WHO) are now taking measures to ensure application developers fulfil a strict set of criteria to protect patients.[26] While the Delphi technique can establish expert consensus, it may also strengthen the safety and quality standards of clinical algorithms. This technique has been widely used in developing paper-based neonatal clinical guidelines in HICs and LICs.[27-29] There are also studies that have used the Delphi technique to develop items used in m-health tools.[30-32] Our study is unique in the application of this technique to develop algorithms on a digital platform specific to neonatal care in low-resource settings.

This study has several limitations. The choice of using a modified two-step Delphi process meant that a final face-to-face meeting was not possible, which may have prevented some exchange of important information to clarify differences in expert opinion. However, this method allowed for the contributions of geographically dispersed experts, maintained their anonymity and prevented

them from conforming to other experts whom they may have viewed as more experienced to themselves. The recruitment of more experts from HICs (64%) compared to LICs (36%), despite originally inviting equal numbers to participate, could have contributed to expert panel bias. Dropouts from the first to the second round could have affected the consensus level and contributed to attrition bias.

Some factors may have contributed to selection bias. The Delphi process is time intensive, which could have meant that those clinicians who are busier with perhaps even more clinical expertise or those with limited internet access (mainly LICs) could not participate. Additionally, offering a financial incentive might have obtained a more equal representation of experts. Another drawback of the Delphi being a labour-intensive process was that a year elapsed between the two rounds. Experts may have forgotten the algorithms and items from the first round in the second round if they did not read the summary of results or refresh their knowledge of the algorithms. Experts reported that they found the layout of the second questionnaire confusing; a re-design contributed to delays.

This study used the Delphi technique to refine four clinical decision algorithms in a neonatal digital platform designed for HCWs in LICs to standardise and improve the quality of newborn care. The key to implementing the NeoTree algorithms in other LICs will be to demonstrate that clinical algorithms in a digital application versus paper-based guidelines can aid HCWs in making faster, more accurate diagnoses and provide better, more cost-effective treatment that will ultimately improve the quality of newborn care and reduce mortality. This will require a large-scale clinical-trial evaluation. Ultimately, with consensus opinion shaping the algorithms of this digital platform, accurate data capture, immediate clinical assessment, and optimal medical care may be attained to improve neonatal outcomes. If this application can be implemented and

reach more LICs in similar settings, the WHO SDG3 goal of halving preventable deaths by 2035 may be attainable.

## **ACKNOWLEDGMENTS**

We thank all the participants of the two rounds of Delphi surveys for their invaluable contributions to revise the clinical algorithms and highlight open questions. We would also like to thank Dr. Brian Corden and Dr. Alice Myers for their reviews of the manuscript.

## **CONTRIBUTORS**

ME, CC and MH conceived the study, generated the methodology and designed the questionnaires. ME conducted the interviews and analysed the data. ME and MC produced the first draft and contributed equally to this manuscript. CC, FF and MH provided edits and comments to the draft. All authors reviewed and approved the final version of the manuscript.

## **FUNDING**

This work was funded in part by the Wellcome Trust Digital Innovation Award (215742/z19/z). FF is supported by the Academy of Medical Sciences, the funders of the Starter Grant for Clinical Lecturers scheme and the UCL Great Ormond Street NIHR Biomedical Research Centre. The funders had no role in the study design, data collection and analysis, or preparation of the manuscript.

## **COMPETING INTERESTS**

None declared.

## **PATIENT CONSENT FOR PUBLICATION**

Not required.

## **PROVENANCE AND PEER REVIEW**

Not commissioned; externally peer reviewed.

## **DATA AVAILABILITY STATEMENT**

All data relevant to the study are included in the article, uploaded as supplementary information or available upon request from the corresponding author.

### **ORCID IDs**

Mari Evans <https://orcid.org/0000-0001-5113-3629>

Mark Corden <https://orcid.org/0000-0001-6146-1634>

Caroline Crehan <https://orcid.org/0000-0002-3655-6954>

Felicity Fitzgerald <https://orcid.org/0000-0001-9594-3228>

Michelle Heys <https://orcid.org/0000-0002-1458-505X>



## REFERENCES

- 1 WHO. 2019. Newborns: reducing mortality. <https://www.who.int/news-room/fact-sheets/detail/newborns-reducing-mortality> [Accessed May 2020].
- 2 Lawn JE, Blencowe H, Oza S, et al. Every Newborn: progress, priorities, and potential beyond survival. *Lancet* 2014;384(9938):189–205.
- 3 WHO. 2019. Levels & trends in child mortality: report 2019. Estimates developed by the UN Inter-agency Group for Child Mortality Estimation. <https://www.unicef.org/reports/levels-and-trends-child-mortality-report-2019> [Accessed May 2020].
- 4 WHO. 2015. WHO Guidelines Approved by the Guidelines Review Committee. [https://www.who.int/publications/guidelines/guidelines\\_review\\_committee/en/](https://www.who.int/publications/guidelines/guidelines_review_committee/en/) [Accessed June 2019].
- 5 WHO. 2011. MHealth: New horizons for health through mobile technologies. [https://www.who.int/goe/publications/goe\\_mhealth\\_web.pdf](https://www.who.int/goe/publications/goe_mhealth_web.pdf) [Accessed June 2019].
- 6 Mitchell M, Hedt-Gauthier BL, Msellemu D, et al. Using electronic technology to improve clinical care results from a before-after cluster trial to evaluate assessment and classification of sick children according to Integrated Management of Childhood Illness (IMCI) protocol in Tanzania. *BMC Med Inform Decis Mak* 2013;13:95.
- 7 Schaeffer LE, Ahmed S, Rahman M, et al. Development and evaluation of a mobile application for case management of small and sick newborns in Bangladesh. *BMC Med Inform Decis Mak* 2019;19:116.
- 8 Thairu L, Wirth M, Lunze K, et al. Innovative newborn health technology for resource-limited environments. *Trop Med Int Health* 2013;18:117–28.

9 Crehan C, Kesler E, Nambiar B, et al. The NeoTree application: Developing an integrated mHealth solution to improve quality of newborn care and survival in a district hospital in Malawi. *BMJ Glob Health* 2019;4:e000860.

10 WHO. 2013. Pocket book of hospital care for children: guidelines for the management of common childhood illnesses, 2nd ed. <https://apps.who.int/iris/handle/10665/81170> [Accessed June 2018].

11 COIN Course, 2017. Care of the infant and newborn in Malawi. The COIN Course Participants Manual. Available from:

[http://cms.medcol.mw/cms\\_uploaded\\_resources/41905\\_12.pdf](http://cms.medcol.mw/cms_uploaded_resources/41905_12.pdf) [Accessed June 2018].

12 Becker JU, Theodosis C, Jacob ST, et al. Surviving sepsis in low-income and middle-income countries: new directions for care and research. *Lancet Infect Dis* 2009;9(9):577–82.

13 Sinha IP, Smyth RL, Williamson PR. Using the Delphi technique to determine which outcomes to measure in clinical trials: recommendations for the future based on a systematic review of existing studies. *PLoS Med* 2011;8(1):e1000393.

14 Hsu CC, Sandford BA. The Delphi Technique: Making Sense of Consensus. *Practical Assessment, Research and Evaluation* 2007;12(10).

<https://scholarworks.umass.edu/pare/vol12/iss1/10> [Accessed July 2018].

15 Akins RB, Tolson H, Cole BR, et al. Stability of response characteristics of a Delphi panel: application of bootstrap data expansion. *BMC Med Res Methodol* 2005;5:37.

16 WHO. 2012. Recommendations for management of common childhood conditions: evidence for technical update of pocket book recommendations: newborn conditions, dysentery, pneumonia, oxygen use and delivery, common causes of fever, severe acute malnutrition and supportive care.

[https://apps.who.int/iris/bitstream/handle/10665/44774/9789241502825\\_eng.pdf?sequence=1](https://apps.who.int/iris/bitstream/handle/10665/44774/9789241502825_eng.pdf?sequence=1)

[Accessed June 2019].

17 European Medicines Agency. 2010. Report on the Expert Meeting on Neonatal and Paediatric Sepsis. [https://www.ema.europa.eu/en/documents/report/report-expert-meeting-neonatal-paediatric-sepsis\\_en.pdf](https://www.ema.europa.eu/en/documents/report/report-expert-meeting-neonatal-paediatric-sepsis_en.pdf) [Accessed July 2019].

18 Babakus E, Mangold WG. Adapting the SERVQUAL scale to hospital services: an empirical investigation. *Health Serv Res* 1992;26(6):767–786.

19 Thompson CM, Puterman AS, Linley LL, et al. The value of a scoring system for hypoxic ischaemic encephalopathy in predicting neurodevelopmental outcome. *Acta Paediatr* 1997;86(7):757–761.

20 Sarnat HB, Sarnat MS. Neonatal encephalopathy following fetal distress: a clinical and electroencephalographic study. *Arch Neurol* 1976;33(10):696–705.

21 Ungerer RL, Lincetto O, McGuire W, et al. Prophylactic versus selective antibiotics for term newborn infants of mothers with risk factors for neonatal infection. *Cochrane Database Syst Rev* 2004;4:CD003957.

22 Obiero CW, Seale AC, Berkley JA. Empiric treatment of neonatal sepsis in developing countries. *Pediatr Infect Dis J* 2015;34(6):659–661.

23 Bhagwani DK, Sharma M, Dolker S, et al. To study the correlation of Thompson scoring in predicting early neonatal outcome in post asphyxiated term neonates. *J Clin Diagn Res* 2016;10(11):SC16–SC19.

24 Costa S, Rocha G, Leitao A, et al. Transient tachypnea of the newborn and congenital pneumonia: a comparative study. *J Matern Fetal Neonatal Med* 2012;25(7):992–4.

- 25 Tikmani SS, Muhammad AA, Shafiq Y, et al. Ambulatory treatment of fast breathing in young infants aged <60 days: A double-blind, randomized, placebo-controlled equivalence trial in low-income settlements of Karachi. *Clin Infect Dis* 2017;64(2):184–189.
- 26 van Haasteren A, Gille F, Fadda M, et al. Development of the mHealth App Trustworthiness checklist. *Digit Health* 2019;5:1–21
- 27 Kamath-Rayne BD, Thukral A, Visick MK, et al. Helping Babies Breathe, Second Edition: A Model for Strengthening Educational Programs to Increase Global Newborn Survival. *Glob Health Sci Pract* 2018;6:538–551.
- 28 Balikuddembe MS, Tumwesigye NN, Wakholi PK, et al. Expert perspectives on essential parameters to monitor during childbirth in low resource settings: a Delphi study in sub-Saharan Africa. *Reprod Health* 2019;16(1):119.
- 29 Housseine N, Punt MC, Browne JL, et al. Delphi consensus statement on intrapartum fetal monitoring in low-resource settings. *Int J Gynaecol Obstet* 2018;146(1):8–16.
- 30 Bakibinga P, Kamande E, Omuya M, et al. The role of a decision-support smartphone application in enhancing community health volunteers' effectiveness to improve maternal and newborn outcomes in Nairobi, Kenya: quasi-experimental research protocol. *BMJ Open* 2017;207(7):e014896.
- 31 Fung JST, Akech S, Kissoon N, et al. Determining predictors of sepsis at triage among children under 5 years of age in resource-limited settings: A modified Delphi process. *PLoS One* 2019;14(1):e0211274.
- 32 Pellé KG, Rambaud-Althaus C, D'Acremont V, et al. Electronic clinical decision support algorithms incorporating point-of-care diagnostic tests in low-resource settings: a target product profile. *BMJ Glob Health* 2020;5:e002067.

**Figure 1.** Outcome of algorithm items after round one and round two of Delphi technique.

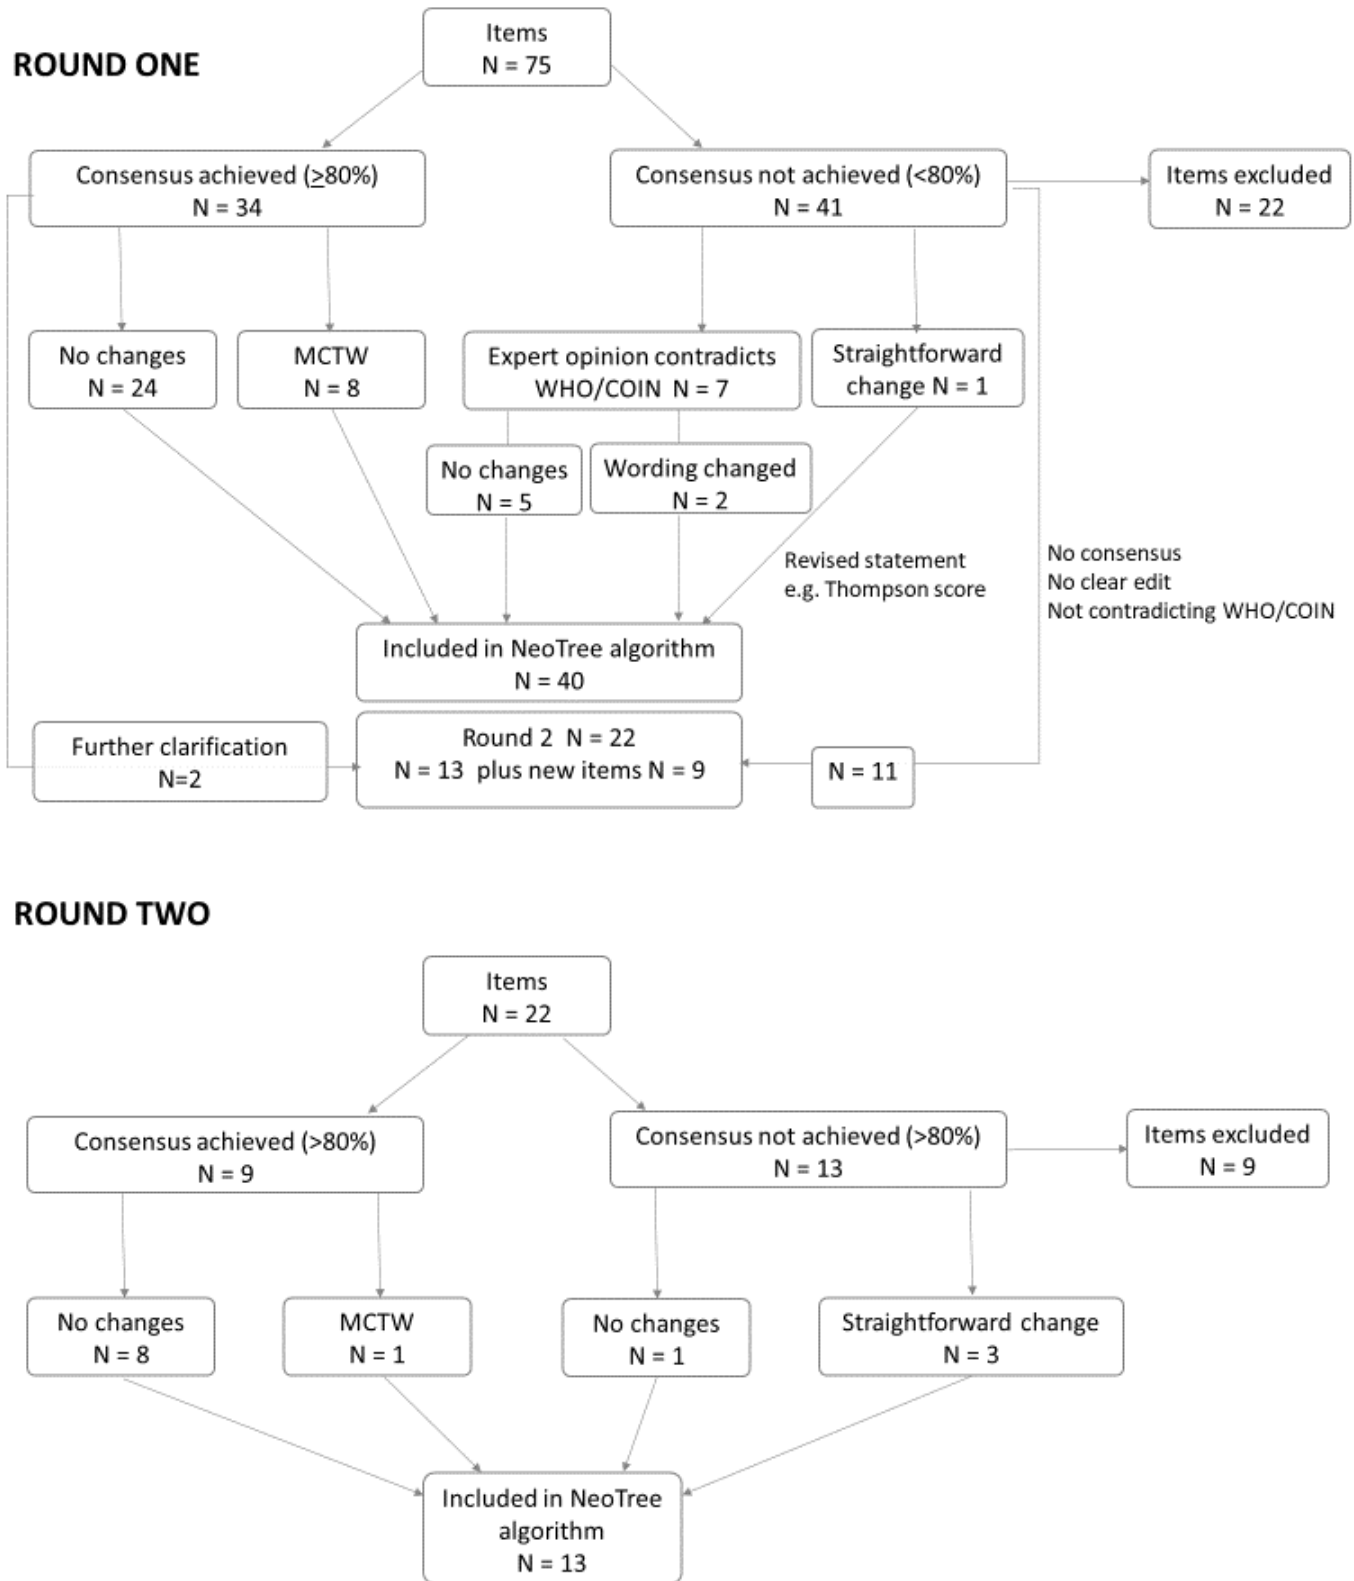

Abbreviations: COIN = Care of the Infant and Newborn in Malawi; MCTW = minor changes to wording; WHO = World Health Organisation

**Figure 2.** Modification of neonatal sepsis algorithm as a result of Delphi technique.

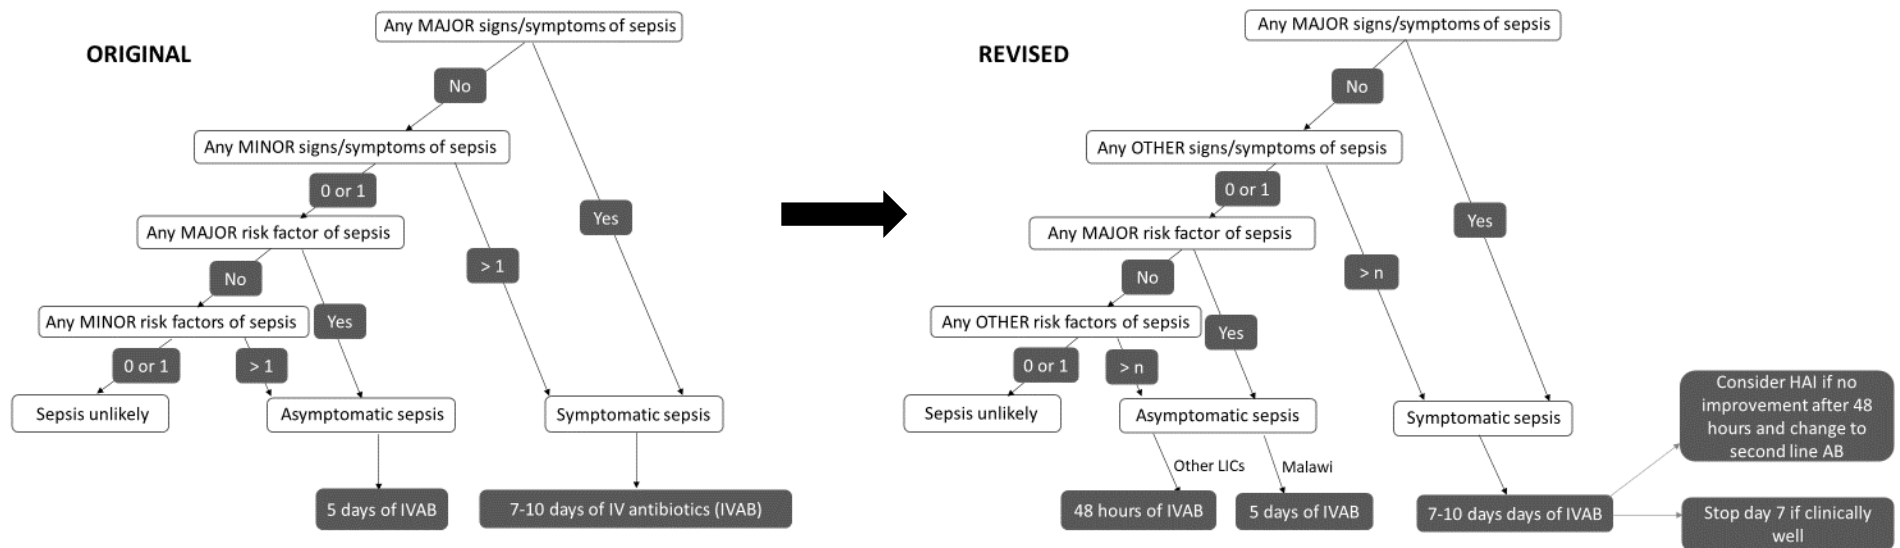

Abbreviations: AB = antibiotics; HAI = hospital-acquired infection; IVAB = intravenous antibiotics; LICs = low-income countries; > n = number of risk factors to be determined
